# Supplementary material
Source: Springer Nature journal article supplement (https://www.springermedizin.de/resource/supplementary/12893_2013_444_MOESM4_ESM.pdf/9512154)
Supplement: MOESM4 [file 9512154]

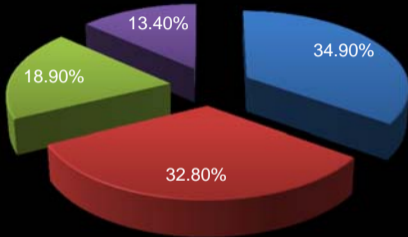

■ Complete Response-63 patients(34.9%)

■ Partial Response- 56 patients(32.8%)

■ Stable Disease- 32 patients(18.9%)

■ Progressive Disease-23 patients(13.4%)
